# Supplementary material
Source: publisher site journal article supplement (http://www.spandidos-publications.com/6179/downloadSupplementary)

Figure S1. Flow chart of literature screening.

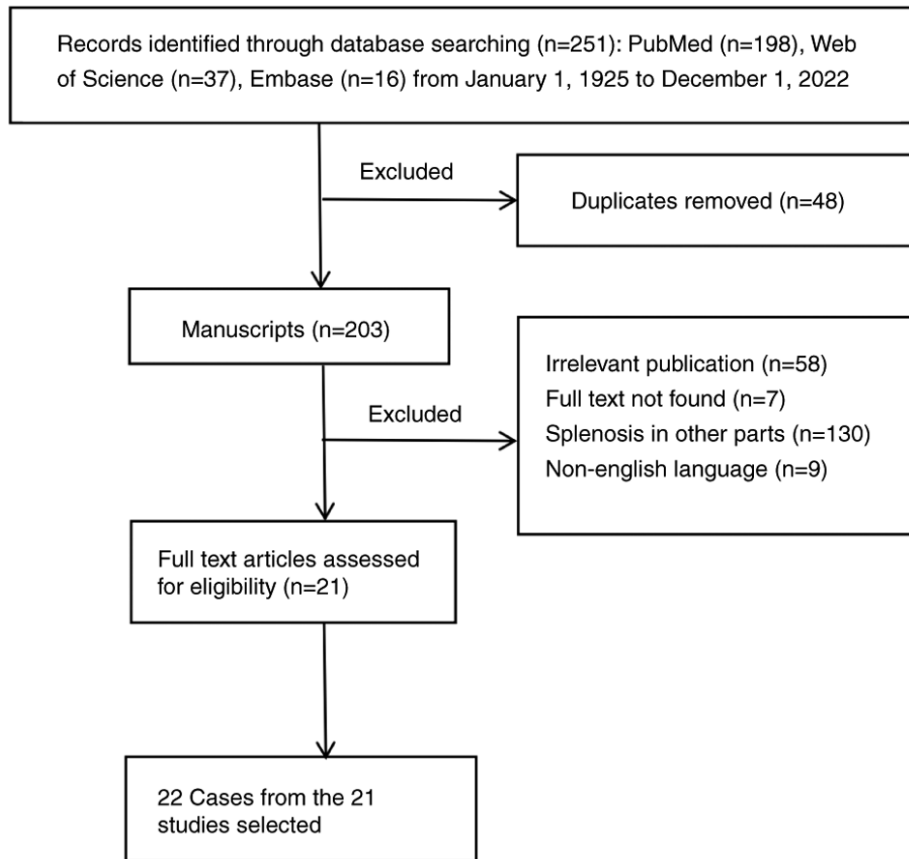

Supplement: Supplementary file 1 [file downloadSupplementary]
